# Supplementary material for: Grafting of cyclopentadienyl ruthenium complexes on aminosilane linker modified mesoporous SBA-15 silicates
Source: Royal Society of Chemistry journal article supplement (doi:10.1039/b611550k), 2006-11-24
Supplement: b611550k.pdf [file b611550k.pdf]

### Supplementary material

TG-MS:

The TG-MS analyses were performed using a Netzsch TG209 system at a heating rate of  $10 \text{ K min}^{-1}$  under Argon.

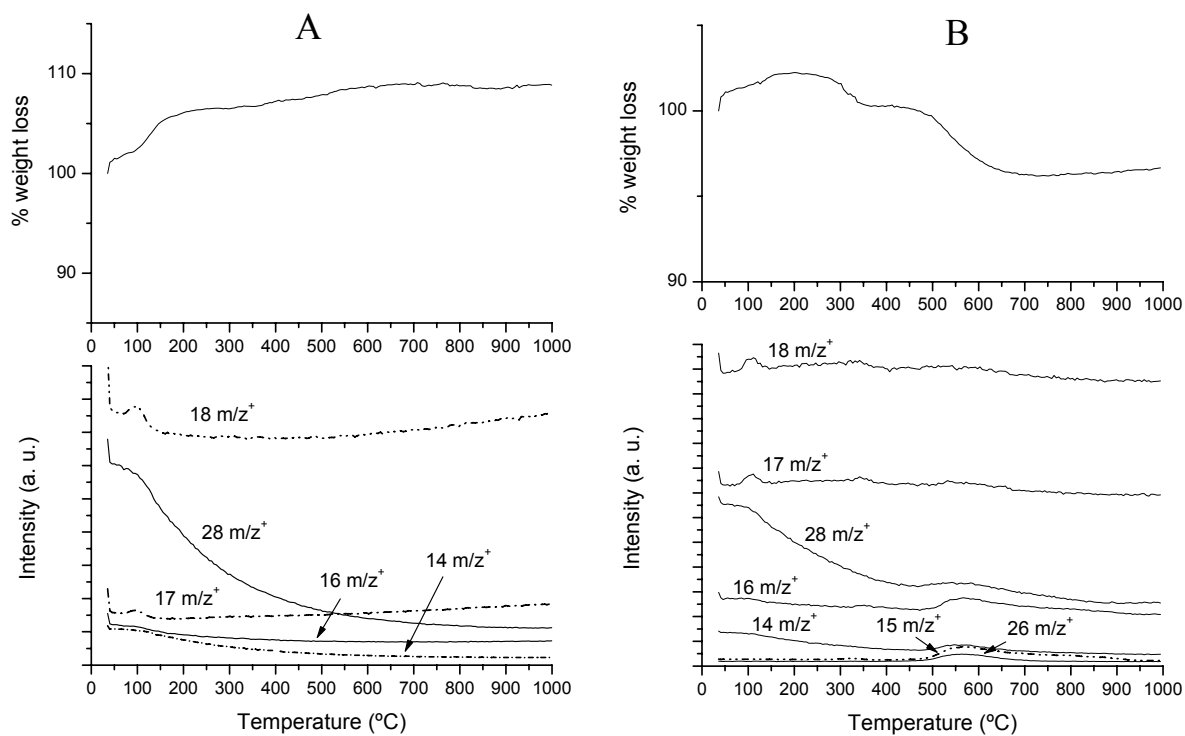

Fig. S1 (A) TG-MS of the SBA-15 support. (B) TG-MS of the SBA-15 modified with the aminosilane linker (SBA-15SNH<sub>2</sub>).

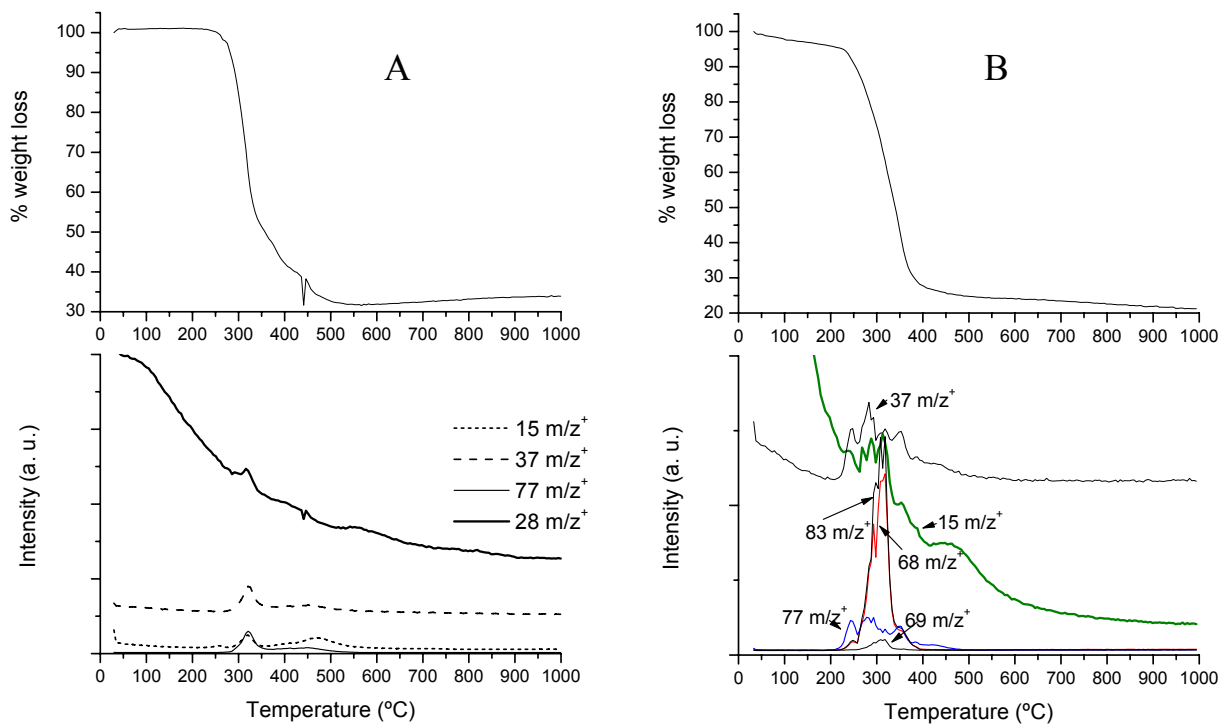

Fig. S2 TG-MS of the organometallic complexes. (A) Complex 2,  $\text{Cp}^*\text{RuCl}(\text{PPh}_3)_2$ . (B) Complex 3,  $\text{Cp}^*\text{RuCl}(\text{C}_3\text{H}_2\text{N}_2(\text{Cy})_2)(\text{PPh}_3)$ .

NMR:

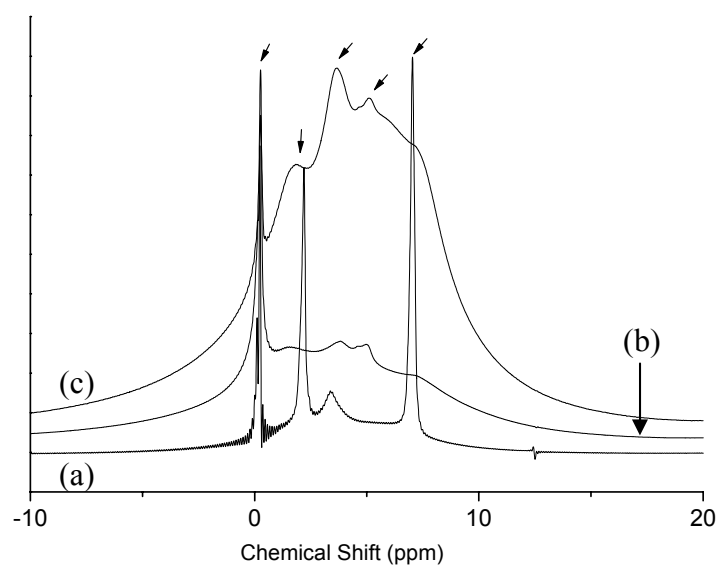

Fig. S3  $^1\text{H}$  MAS-NMR spectra of (a) SBA-15 $\text{NH}_2$ ; (b) SBA-15 $\text{NH}_2\text{Cp}^*\text{Ru}$ ; (c) SBA-15 $\text{NH}_2\text{Cp}^*\text{RuNHC}$ .
